# Supplementary material for: HIF1α is dispensable for oocyte development and female fertility in mice
Source: PeerJ. 2022 May 3;10:e13370. doi: 10.7717/peerj.13370 (PMC9074875; doi:10.7717/peerj.13370)
Supplement: Supplemental Information 1 — qRT-PCR analysis of Hifα subunits mRNA levels in oocytes from WT mice. The relative mRNA levels of Hif3α in WT oocytes were set to 1.0. Data represent the mean ± SEM (n = 3) [file peerj-10-13370-s001.xlsx]

## Sheet: Sheet1
Fig1A
		Ct	Ct Mean	ΔΔCt	RQ Mean	RQ SD
	Hif1α	21.913	21.883	-6.705	104.329	0.15
		22.115
		21.62
	Hif2α	31.396	31.56	2.972	0.12745	0.084
		31.708
		31.575
	Hif3α	28.593	28.588	0	1	0.092
		28.349
		28.822
