# Supplementary material for: HIF1α is dispensable for oocyte development and female fertility in mice
Source: PeerJ. 2022 May 3;10:e13370. doi: 10.7717/peerj.13370 (PMC9074875; doi:10.7717/peerj.13370)
Supplement: Supplemental Information 3 — qRT-PCR analysis of Hif1α mRNA levels in oocytes from Control and Hif1α-cKO females. The relative mRNA level of Hif1α in Control oocytes was set to 1.0. [file peerj-10-13370-s003.xlsx]

## Sheet: Sheet1
Fig1D
		Ct	Gapdh	ΔCt	ΔΔCt	RQ
	Control	22.36	25.416	-3.056	0	1
	Hif1α-cko	26.516	25.636	0.88	3.936	0.065335
	Control	27.218	30.642	-3.424	0	1
	Hif1α-cko	32.397	30.762	1.635	5.059	0.03
	Control	25.542	29.442	-3.9	0	1
	Hif1α-cko	29.522	28.87	0.652	4.552	0.0426
