# Supplementary material for: HIF1α is dispensable for oocyte development and female fertility in mice
Source: PeerJ. 2022 May 3;10:e13370. doi: 10.7717/peerj.13370 (PMC9074875; doi:10.7717/peerj.13370)
Supplement: Supplemental Information 5 — Cumulative numbers of pups per female born from Control and Hif1α-cKO mice for 6 months. [file peerj-10-13370-s005.xlsx]

## Sheet: Sheet1
Fig2A
		Total pups
		1m	2m	3m	4m	5m	6m
	Control1	7	7	17	21	27	31
	Control2	5	12	15	21	27	27
	Control3	5	9	15	21	30	37
	Control4	5	9	9	19	27	36
	Control5	5	13	13	20	22	29
	Control6	4	11	20	28	35	38
	Control7	6	13	18	22	26	35
	Hif1α-cKO-1	2	11	15	23	28	28
	Hif1α-cKO-2	5	10	10	25	29	35
	Hif1α-cKO-3	6	13	18	24	29	36
	Hif1α-cKO-4	6	13	20	20	24	31
	Hif1α-cKO-5	7	7	15	20	23	28
	Hif1α-cKO-6	6	10	18	23	26	32
	Hif1α-cKO-7	5	9	19	29	38	43
