# Supplementary material for: HIF1α is dispensable for oocyte development and female fertility in mice
Source: PeerJ. 2022 May 3;10:e13370. doi: 10.7717/peerj.13370 (PMC9074875; doi:10.7717/peerj.13370)
Supplement: Supplemental Information 6 — Average number of oocytes obtained after superovulation from Control and Hif1α-cKO females at indicated age [file peerj-10-13370-s006.xlsx]

## Sheet: Sheet1
Fig2C
	MII oocytes(3 months)			MII oocytes(6 months)
	Control1	23		WT1	27
	Control2	25		WT2	29
	Control3	33		WT3	24
	Control4	18		WT4	22
	Control5	33		WT5	22
	Control6	29		WT6	34
	Control7	25		WT7	28
	Control8	26		WT8	25
	Control9	37		WT9	28
	Control10	29		WT10	29
	Control11	35		WT11	24
	Hif1α-cKO-1	36		KO1	21
	Hif1α-cKO-2	16		KO2	21
	Hif1α-cKO-3	31		KO3	27
	Hif1α-cKO-4	24		KO4	29
	Hif1α-cKO-5	41		KO5	22
	Hif1α-cKO-6	36		KO6	28
	Hif1α-cKO-7	22		KO7	29
	Hif1α-cKO-8	32		KO8	33
	Hif1α-cKO-9	27		KO9	26
	Hif1α-cKO-10	29		KO10	32
	Hif1α-cKO-11	27		KO11	20
