# Supplementary material for: HIF1α is dispensable for oocyte development and female fertility in mice
Source: PeerJ. 2022 May 3;10:e13370. doi: 10.7717/peerj.13370 (PMC9074875; doi:10.7717/peerj.13370)
Supplement: Supplemental Information 7 — The percentage of Hif1α-cKO oocyte-derived embryos that successfully progressed to the 2-cell, 4-cell and blastocyst stage at E1.5, E2 and E4 during in vitro culture. [file peerj-10-13370-s007.xlsx]

## Sheet: Sheet1
Fig2F
		Total	2-cell	2-cell (%)	4-cell	4-cell (%)	blastocyte	blastocyte (%)
	Control1	64	58	90.625	58	90.625	53	82.8125
	Control2	86	79	91.8605	79	91.8605	71	82.5581
	Control3	73	64	87.6712	64	87.6712	59	80.8219
	Control4	88	75	85.2273	75	85.2273	75	85.2273
	Hif1α-cKO-1	76	76	100	72	94.7368	65	85.5263
	Hif1α-cKO-2	41	39	95.122	37	90.2439	34	82.9268
	Hif1α-cKO-3	117	105	89.7436	99	84.6154	89	76.0684
	Hif1α-cKO-4	92	88	95.6522	83	90.2174	79	85.8696
