# Supplementary material for: HIF1α is dispensable for oocyte development and female fertility in mice
Source: PeerJ. 2022 May 3;10:e13370. doi: 10.7717/peerj.13370 (PMC9074875; doi:10.7717/peerj.13370)
Supplement: Supplemental Information 9 — GVBD rates of oocytes from 8-week-old Control and Hif1 α-cKO mice. [file peerj-10-13370-s009.xlsx]

## Sheet: Sheet1
	Fig3D		Control
			Time	Total	GVBD1 number	GVBD %			Time	Total	GVBD1 number	GVBD %			Time	Total	GVBD1 number	GVBD %
		R1	0	100	0	0		R2	0	100	0	0		R3	0	100	0	0
			1	100	32	32			1	100	37	37			1	100	26	26
			2	100	76	76			2	100	81	81			2	100	69	69
			3	100	92	92			3	100	89	89			3	100	95	95
			Hif1α-cKO
			Time	Total	GVBD1 number	GVBD %			Time	Total	GVBD1 number	GVBD %			Time	Total	GVBD1 number	GVBD %
		R1	0	100	0	0		R2	0	100	0	0		R3	0	100	0	0
			1	100	25	25			1	100	35	35			1	100	41	41
			2	100	72	72			2	100	77	77			2	100	80	80
			3	100	88	88			3	100	93	93			3	100	92	92
