# Supplementary material for: HIF1α is dispensable for oocyte development and female fertility in mice
Source: PeerJ. 2022 May 3;10:e13370. doi: 10.7717/peerj.13370 (PMC9074875; doi:10.7717/peerj.13370)
Supplement: Supplemental Information 10 — PB1 rates of oocytes from 8-week-old Control and Hif1 α-cKO mice. [file peerj-10-13370-s010.xlsx]

## Sheet: Sheet1
	Fig3E		Control
			Time	Total	Pb1 number	Pb1 %			Time	Total	Pb1 number	Pb1 %			Time	Total	Pb1 number	Pb1 %
		R1	6	77	0	0		R2	6	83	0	0		R3	6	107	0	0
			7	77	0	0			7	83	0	0			7	107	0	0
			8	77	0	0			8	83	4	4.81928			8	107	4	3.73832
			9	77	8	10.3896			9	83	9	10.8434			9	107	13	12.1495
			10	77	19	24.6753			10	83	23	27.7108			10	107	37	34.5794
			11	77	33	42.8571			11	83	41	49.3976			11	107	55	51.4019
			12	77	49	63.6364			12	83	55	66.2651			12	107	71	66.3551
			13	77	61	79.2208			13	83	70	84.3373			13	107	88	82.243
			14	77	68	88.3117			14	83	78	93.9759			14	107	97	90.6542
			15	77	70	90.9091			15	83	78	93.9759			15	107	98	91.5888
			16	77	70	90.9091			16	83	79	95.1807			16	107	98	91.5888
			Hif1α-cKO
			Time	Total	Pb1 number	Pb1 %			Time	Total	Pb1 number	Pb1 %			Time	Total	Pb1 number	Pb1 %
		R1	6	57	0	0		R2	6	152	0	0		R3	6	96	0	0
			7	57	0	0			7	152	0	0			7	96	0	0
			8	57	3	5.26316			8	152	8	5.26316			8	96	5	5.20833
			9	57	10	17.5439			9	152	21	13.8158			9	96	19	19.7917
			10	57	19	33.3333			10	152	45	29.6053			10	96	36	37.5
			11	57	28	49.1228			11	152	69	45.3947			11	96	52	54.1667
			12	57	40	70.1754			12	152	94	61.8421			12	96	74	77.0833
			13	57	45	78.9474			13	152	124	81.5789			13	96	85	88.5417
			14	57	51	89.4737			14	152	137	90.1316			14	96	91	94.7917
			15	57	53	92.9825			15	152	141	92.7632			15	96	92	95.8333
			16	57	54	94.7368			16	152	141	92.7632			16	96	92	95.8333
