# Supplementary material for: HIF1α is dispensable for oocyte development and female fertility in mice
Source: PeerJ. 2022 May 3;10:e13370. doi: 10.7717/peerj.13370 (PMC9074875; doi:10.7717/peerj.13370)
Supplement: Supplemental Information 11 — Quantification of Control (n = 78) and Hif1α-cKO oocytes (n = 69) with spindle defects or chromosome misalignment. Data are expressed as mean ± SD. [file peerj-10-13370-s011.xlsx]

## Sheet: Sheet1
Fig3G
		Meiotic defects (%)
Control	R1	12
	R2	16
	R3	10
Hif1α-cko	R1	13
	R2	11.3
	R3	12
